# Supplementary material for: Urinary Proteomic/Peptidomic Biosignature of Breast Cancer Patients Using 1D SDS-PAGE Combined with Matrix-Assisted Laser Desorption/Ionization-Time of Flight Mass Spectrometry
Source: MDPI journal article supplement (doi:10.3390/separations10050291), 2023-05-05
Supplement: s1 [file s1]

Table S1 – Characteristics of subjects which participated in the study.

| <b>Samples</b>                    | <b>BC</b>   | <b>HCS</b>     |
|-----------------------------------|-------------|----------------|
| Number                            | 50          | 50             |
| Age (range, average)              | (40-78, 59) | (44-68, 56)    |
| Disease stage (number of samples) | IA (13)     | Not applicable |
|                                   | IIA (7)     |                |
|                                   | IIIA (7)    |                |
|                                   | IIB (10)    |                |
|                                   | IIIB (7)    |                |
|                                   | IIIC (6)    |                |

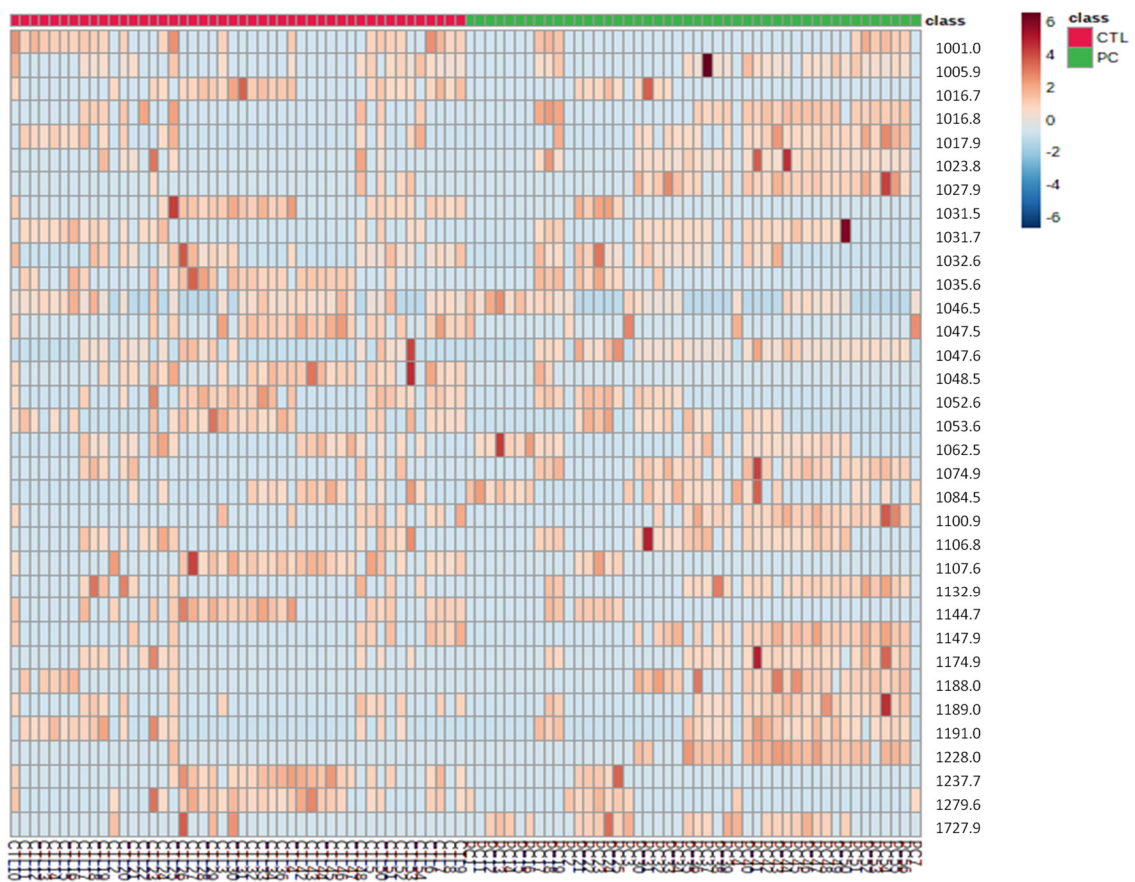

Figure S1. Heatmap of  $m/z$  values for samples from BC patients and healthy control (HCs)
